# Supplementary material
Source: PubMed Central journal article supplement (PMC4877169)
Supplement: NIHMS709312-supplement-8.pdf [file NIHMS709312-supplement-8.pdf]

**Supplemental Table 1. Cellular proteins identified in this study bound by retroviral 5' UTRs and their previously described activity in retrovirus biology**

| 5' UTR binding protein | Activity in retrovirus biology                                                                                                                                                                                                                                                                                                                                                                                                                                                                                                                                                                                                                |
|------------------------|-----------------------------------------------------------------------------------------------------------------------------------------------------------------------------------------------------------------------------------------------------------------------------------------------------------------------------------------------------------------------------------------------------------------------------------------------------------------------------------------------------------------------------------------------------------------------------------------------------------------------------------------------|
| ACTA1, ACTB, ACTG1     | Actin modulation by different host proteins may be important for HIV-1 particle release and cell-cell transmission (Wen et al., 2014)<br>Perturbation of actin cytoskeleton influences release of HIV-1 virions sequestered in intracellular plasma membrane-connected compartments in human monocyte-derived macrophages (Mlcochova et al., 2013)                                                                                                                                                                                                                                                                                            |
| ATP5B                  | Mediates transfer of HIV-1 from APCs to CD4 (+) target cells (Yavlovich et al., 2012)<br>Interacts with HIV TAR RNA-Binding Protein (Chi et al., 2011)                                                                                                                                                                                                                                                                                                                                                                                                                                                                                        |
| DBN1                   | Identified in a cDNA screen in HIV infected cells to identify potential therapeutic targets (Nguyen et al., 2007)<br>Actin binding protein that regulates HIV-1 triggered actin polymerizations and viral infection (Gordon-Alonso et al., 2013)<br>Interacts with HIV TAR RNA-Binding Protein (Chi et al., 2011)                                                                                                                                                                                                                                                                                                                             |
| DDX17                  | Overexpression of wild-type DDX17 increases HIV-1 RNA packaging and infectivity, transfection of a DDX17 mutant decreases Gag-Pol frameshift efficiency (Lorgeoux et al., 2013).<br>Binds to Rev and co-localizes with Rev in nucleolus (Naji et al., 2012; Yasuda-Inoue et al., 2013b)<br>Interacts with HIV TAR RNA-Binding Protein (Chi et al., 2011)                                                                                                                                                                                                                                                                                      |
| DDX21                  | Binds to rev and co-localizes with rev in nucleolus (Naji et al., 2012; Yasuda-Inoue et al., 2013b);<br>Interacts with HIV TAR RNA-Binding Protein (Chi et al., 2011)                                                                                                                                                                                                                                                                                                                                                                                                                                                                         |
| DDX3X (DDX3)           | Directly interacts with CRM1 in a Ran-independent manner. Binds Rev and increases Rev/RRE-mediated nuclear export of incompletely spliced HIV-1 RNA and replication (Ishaq et al., 2008; Yedavalli and Jeang, 2011)<br>HIV-1 and SNV translation are sensitive to DDX3 knockdown (Soto-Rifo et al., 2012)<br>Co-localizes with Rev in nucleolus (Lai et al., 2013; Yasuda-Inoue et al., 2013b)<br>Required for Tat function (Yasuda-Inoue et al., 2013a)<br>Interacts with Tat to facilitate mRNA translation (Lai et al., 2013)<br>Replaces eIF4E to promote compartmentalized translation initiation of HIV-1 gRNA (Soto-Rifo et al., 2012) |
| DDX5                   | Cofactor of HIV-1 Rev (Zhou et al., 2013)<br>Co-localizes with Rev in nucleolus (Naji et al., 2012; Yasuda-Inoue et al., 2013a, b)<br>Interacts with TAR RNA-binding protein (Chi et al., 2011)                                                                                                                                                                                                                                                                                                                                                                                                                                               |
| DHX30                  | Over-expression of DHX30 increases HIV-1 transcription, Gag expression and virus release but leads to a decrease in packaging and infectivity (Zhou et al., 2008a)<br>Involved in the ZAP protein anti-viral function against multiple viruses including MLV (Lee et al., 2013; Ye et al., 2010)                                                                                                                                                                                                                                                                                                                                              |
| DHX9                   | Modulates HIV-1 translation and infectivity (Bolinger et al., 2010; Hartman et al., 2006)<br>Phosphorylated by PKR as an HIV-1 antiviral response (Sadler et al., 2009)<br>Interacts with HIV Gag (Roy et al., 2006)<br>Activates CTE mediated export of type D retroviruses (Tang and Wong-Staal, 2000; Westberg et al., 2000; Yang et al., 2001)<br>Regulates HIV-1 transcription (Fujii et al., 2001)                                                                                                                                                                                                                                      |
| EEF1A1                 | Relocalized by HIV-1 Nef to inhibit ER stress-mediated apoptosis in macrophages (Abbas et al., 2012)                                                                                                                                                                                                                                                                                                                                                                                                                                                                                                                                          |
| EIF2AK2 (PKR)          | Activation caused by Alpha-interferon restricts HTLV-1 and 2 de novo infection (Cachat et al., 2013);<br>Interacts with HIV TAR RNA-Binding Protein (Chi et al., 2011)                                                                                                                                                                                                                                                                                                                                                                                                                                                                        |
| EIF2S1                 | Interacts with HIV TAR RNA-Binding Protein (Chi et al., 2011)                                                                                                                                                                                                                                                                                                                                                                                                                                                                                                                                                                                 |
| ELAVL1 (HuR)           | Conflicting data regarding interaction with HIV-1 RT (Ahn et al., 2010; Lemay et al., 2008)<br>Repressor of HIV-1 IRES activity (Rivas-Aravena et al., 2009)<br>Increases the expression of TNF- $\alpha$ and IL-6 in response to HIV-1 protease inhibitor drugs (Zhou et al., 2007)                                                                                                                                                                                                                                                                                                                                                          |
| FLNA                   | Interacts with HIV-1 Gag and contributes to particle assembly (Cooper et al., 2011)<br>Regulates actin-dependent clustering of HIV receptors (Jimenez-Baranda et al., 2007)                                                                                                                                                                                                                                                                                                                                                                                                                                                                   |
| FN1                    | Down regulated in MMTV-induced tumors (Popken-Harris et al., 2006)                                                                                                                                                                                                                                                                                                                                                                                                                                                                                                                                                                            |
| GNL3                   | Interacts with HIV TAR RNA-Binding Protein (Chi et al., 2011)                                                                                                                                                                                                                                                                                                                                                                                                                                                                                                                                                                                 |

|                                                                                                                                                                                                                                                             |                                                                                                                                                                                                                                                                                                                                                                                                                                                                                                                                                                                                                                             |
|-------------------------------------------------------------------------------------------------------------------------------------------------------------------------------------------------------------------------------------------------------------|---------------------------------------------------------------------------------------------------------------------------------------------------------------------------------------------------------------------------------------------------------------------------------------------------------------------------------------------------------------------------------------------------------------------------------------------------------------------------------------------------------------------------------------------------------------------------------------------------------------------------------------------|
| GRSF1                                                                                                                                                                                                                                                       | Regulates balance of HIV-1 mRNA species (Jablonski and Caputi, 2009)                                                                                                                                                                                                                                                                                                                                                                                                                                                                                                                                                                        |
| HNRNPA1                                                                                                                                                                                                                                                     | Overexpression counters the effect of the instability RNA element found in the HIV-1 <i>gag</i> coding region that inhibits IRES and cap dependent translation (Valiente-Echeverria et al., 2013)<br>Critical for HTLV-1 replication in transformed T lymphocytes (Kress et al., 2005)<br>Regulates balance of HIV-1 mRNA species and the expression of their protein products (Hallay et al., 2006; Jablonski and Caputi, 2009; Lund et al., 2012)<br>Interacts with HIV-1 Rev (Hadian et al., 2009)<br>Interacts with HIV TAR RNA-Binding Protein (Chi et al., 2011)                                                                      |
| HNRNPA2B1,<br>HNRNPAB,<br>HNRNPM,<br>NSUN2, RPLP0,<br>RPLP1, RPL7,<br>RPL7A, RPL12,<br>RPL15, RPL22,<br>RPL23A, RPL24,<br>RPL27, RPL27A,<br>RPL29, RPL3,<br>RPL31, RPL35,<br>RPS2, RPS7, RPS8,<br>RPS13, RPS14,<br>RPS15A, RPS16,<br>RPS18, RPS26,<br>U2AF1 | Interacts with HIV TAR RNA-Binding Protein (Chi et al., 2011)                                                                                                                                                                                                                                                                                                                                                                                                                                                                                                                                                                               |
| HNRNPA3                                                                                                                                                                                                                                                     | Regulates balance of HIV-1 mRNA species (Jablonski and Caputi, 2009)                                                                                                                                                                                                                                                                                                                                                                                                                                                                                                                                                                        |
| HNRNPD                                                                                                                                                                                                                                                      | Knock down leads to a decrease in accumulation of unspliced and singly spliced HIV-1 RNAs in the cytoplasm (Lund et al., 2012)                                                                                                                                                                                                                                                                                                                                                                                                                                                                                                              |
| HNRNPF                                                                                                                                                                                                                                                      | Regulates balance of HIV-1 mRNA species (Jablonski and Caputi, 2009)<br>Interacts with HIV TAR RNA-Binding Protein (Chi et al., 2011)                                                                                                                                                                                                                                                                                                                                                                                                                                                                                                       |
| HNRNPH1                                                                                                                                                                                                                                                     | Interacts with HTLV-2 p28 (Doueiri et al., 2012);<br>Regulates balance of HIV-1 mRNA species (Jablonski and Caputi, 2009)                                                                                                                                                                                                                                                                                                                                                                                                                                                                                                                   |
| HNRNPH3                                                                                                                                                                                                                                                     | Regulates balance of HIV-1 RNA species (Jablonski and Caputi, 2009)                                                                                                                                                                                                                                                                                                                                                                                                                                                                                                                                                                         |
| HNRNPK                                                                                                                                                                                                                                                      | Interacts with HTLV p28 and p30 (Doueiri et al., 2012); Interacts with HIV-1 Rev (Hadian et al., 2009)                                                                                                                                                                                                                                                                                                                                                                                                                                                                                                                                      |
| HNRNPR                                                                                                                                                                                                                                                      | Interacts with HIV-1 Rev (Hadian et al., 2009)                                                                                                                                                                                                                                                                                                                                                                                                                                                                                                                                                                                              |
| HNRNPU                                                                                                                                                                                                                                                      | An N-terminal fragment binds the 3'LTR of all species of HIV-1 RNA to prevent their nuclear export, implying a role for HNRNPU in HIV RNA nuclear export (Valente and Goff, 2006)<br>Interacts with HIV-1 Rev (Hadian et al., 2009)                                                                                                                                                                                                                                                                                                                                                                                                         |
| HSP90AB1                                                                                                                                                                                                                                                    | Rescues infectivity of defective or ritonavir resistant HIV (Joshi et al., 2013; Joshi and Stoddart, 2011)                                                                                                                                                                                                                                                                                                                                                                                                                                                                                                                                  |
| HSPA8                                                                                                                                                                                                                                                       | Enhances syncytium formation induced by HTLV-1 (Fang et al., 1999; Sagara et al., 1998)                                                                                                                                                                                                                                                                                                                                                                                                                                                                                                                                                     |
| IGF2BP1<br>(ZBP1, IMP1)                                                                                                                                                                                                                                     | Binds to HIV-1 Gag NC domain, and overexpression leads to a decrease in infectivity through decreased RNA packaging, defective Gag processing on cellular membranes, and inhibition of virus particle maturation (Zhou et al., 2008b)<br>Ectopic expression leads to Rev translocation from the nucleus to cytoplasm causing an accumulation of multiply spliced viral RNAs (Zhou et al., 2009)<br>Found in HIV-1 RNP containing Gag and STAU1 (Milev et al., 2010)<br>Overexpression enhances stability and packaging of MLV based retroviral vectors (Mai and Gao, 2010)<br>Interacts with HIV TAR RNA-Binding Protein (Chi et al., 2011) |
| ILF3 (NF90)                                                                                                                                                                                                                                                 | Binds to HIV-1 Rev and RRE RNA to inhibit Rev mediated nuclear export (Urcuqui-Inchima et al., 2006)                                                                                                                                                                                                                                                                                                                                                                                                                                                                                                                                        |
| IQGAP1                                                                                                                                                                                                                                                      | Binds to MA of MLV Gag to play a role in early and late steps of viral replication and assembly (Leung et al., 2006)                                                                                                                                                                                                                                                                                                                                                                                                                                                                                                                        |
| KARS                                                                                                                                                                                                                                                        | Packaged into HIV-1 VP (Cen et al., 2002); Interacts with CA domain of HIV Gag <i>in vivo</i> (Javanbakht et al., 2003)<br>May be involved in tRNA packaging (Saadatmand et al., 2008)                                                                                                                                                                                                                                                                                                                                                                                                                                                      |
| KIF3B                                                                                                                                                                                                                                                       | KIF3B associates KIF3A (Yamazaki et al., 1995), and KIF3 is required for HIV-1 release from infected macrophages (Gaudin et al., 2012)                                                                                                                                                                                                                                                                                                                                                                                                                                                                                                      |

|               |                                                                                                                                                                                                                                                                                                                                                                                                                                  |
|---------------|----------------------------------------------------------------------------------------------------------------------------------------------------------------------------------------------------------------------------------------------------------------------------------------------------------------------------------------------------------------------------------------------------------------------------------|
| LRPPRC        | Interacts with HIV nucleic acids and knockdown attenuates HIV-1 infection (Schweitzer et al., 2012)                                                                                                                                                                                                                                                                                                                              |
| MATR3         | Interacts with HIV-1 Rev in an RNA-dependent manner, and is required for Rev mediated nuclear export of unspliced HIV-1 RNAs (Kula et al., 2011)<br>HIV-1 pre-mRNA bound to PSF and MATR3 is committed to Rev mediated nuclear export (Kula et al., 2013)<br>Co-factor of HIV-1 for regulating post-transcriptional gene expression (Yedavalli and Jeang, 2011)<br>Interacts with HIV TAR RNA-Binding Protein (Chi et al., 2011) |
| MYH9          | Renal MYH9 is downregulated in HIV-1 patients with HIV-associated nephropathy (Hays et al., 2012)                                                                                                                                                                                                                                                                                                                                |
| NCL           | Interacts with MuLV Gag via NC to inhibit assembly (Bacharach et al., 2000)<br>May be important in HIV-1 host cell entry (Nisole et al., 2002)<br>May promote HIV-1 budding (Ueno et al., 2004)                                                                                                                                                                                                                                  |
| NONO (p54nrb) | Binds instability element in HIV-1 Gag RNA in the cytoplasm and may play a role in late stages of HIV-1 mRNA metabolism (Zolotukhin et al., 2003)                                                                                                                                                                                                                                                                                |
| NOP2          | Interacts with HIV TAR RNA-Binding Protein (Chi et al., 2011)                                                                                                                                                                                                                                                                                                                                                                    |
| NPM1          | Interacts with HIV-1 Tat and HIV-1 infection results in the acetylation of NPM1 which is critical for Tat nuclear localization and Tat-mediated transcription activation (Gadad et al., 2011a; Gadad et al., 2011b)                                                                                                                                                                                                              |
| PABPC1        | Cleaved by MMTV, HIV-1, and HIV-2 Protease, and not MoMLV, HTLV-1, and SIV proteases (Alvarez et al., 2006)<br>Interacts with HIV TAR RNA-Binding Protein (Chi et al., 2011)                                                                                                                                                                                                                                                     |
| POLR2B        | Synthesizes retroviral RNA from integrated provirus retroviruses (Rabson and Graves, 1997)                                                                                                                                                                                                                                                                                                                                       |
| PRPF8         | Constituent of U5 snRNP, does not bind to RSV negative regulator of splicing (NRS) element; hypothesized as mechanism to explain lack of splicing (Giles and Beemon, 2005); Interacts with HIV TAR RNA-Binding Protein (Chi et al., 2011)                                                                                                                                                                                        |
| PTBP1         | Identified in previous proteomics studies as interacting with HIV RNA (Black et al., 1996; Kula et al., 2011)<br>TAR-RNA binding protein (Chi et al., 2011);                                                                                                                                                                                                                                                                     |
| RAN           | Numerous retroviral Gag proteins and accessory proteins enter the nucleus during infection, reviewed in (Stake et al., 2013)                                                                                                                                                                                                                                                                                                     |
| RBMX          | Reduced levels in the nucleoli of HIV-1 Tat expressing Jurkat T-cells (Jarbouli et al., 2012)                                                                                                                                                                                                                                                                                                                                    |
| RPL4          | Overexpression of RPL4 in certain cell types increases readthrough of <i>gag</i> stop codons to produce <i>gag-pol</i> transcripts for MoMLV and HIV-1 and impairs virus replication (Green et al., 2012)<br>Interacts with HIV TAR RNA-Binding Protein (Chi et al., 2011)                                                                                                                                                       |
| RPL6          | Interacts with HTLV-1 Tax protein (Boxus et al., 2008)<br>HIV TAR RNA-Binding Protein (Chi et al., 2011)                                                                                                                                                                                                                                                                                                                         |
| RPL8          | Upregulated in B-cells of SIV-infected monkeys with B-cell non-Hodgkin's lymphomas (Tarantul et al., 2000)                                                                                                                                                                                                                                                                                                                       |
| RPL9          | Interacts with MMTV Gag; knockdown impairs virus release, but not Gag expression (Beyer et al., 2013)<br>Interacts with HIV TAR RNA-Binding Protein (Chi et al., 2011)                                                                                                                                                                                                                                                           |
| RPS10         | Interacts with HIV-1 Nef, and Nef decreases translation in a dose-dependent manner (Abbas et al., 2012)<br>Interacts with HIV TAR RNA-Binding Protein (Chi et al., 2011)                                                                                                                                                                                                                                                         |
| RPS23         | Upregulated in HIV-1 patients undergoing ART (Massanella et al., 2013);<br>Interacts with HIV TAR RNA-Binding Protein (Chi et al., 2011)                                                                                                                                                                                                                                                                                         |
| RPS25         | Required for HTLV-1 IRES function (Olivares et al., 2014);<br>Interacts with HIV TAR RNA-Binding Protein (Chi et al., 2011)                                                                                                                                                                                                                                                                                                      |
| RPS3A         | Upregulated in B-cells of SIV-infected monkeys with B-cell non-Hodgkin's lymphomas (Tarantul et al., 2000);<br>Interacts with HIV TAR RNA-Binding Protein (Chi et al., 2011)                                                                                                                                                                                                                                                     |
| RPS6          | Antiretroviral drugs indinavir, nelfinavir, and zidovudine decrease translation, partly through impairing phosphorylation of RPS6 (Hong-Brown et al., 2004, 2005)<br>Interacts with HIV TAR RNA-Binding Protein (Chi et al., 2011)                                                                                                                                                                                               |
| RUVBL1        | Identified as HIV-1 Tat interaction partner via <i>in vitro</i> proteomics study (Gautier et al., 2009)<br>Downregulated in THP-1 cells infected with HIV-1 (Pathak et al., 2009)                                                                                                                                                                                                                                                |
| SFPQ/PSF      | The unspliced HIV-1 RNA contains cis-acting instability (INS) elements located in gag and env open reading frames that impair RNA stability, nucleocytoplasmic transport and translation. INS                                                                                                                                                                                                                                    |

|                               |                                                                                                                                                                                                                                                                                                                                                                                                                       |
|-------------------------------|-----------------------------------------------------------------------------------------------------------------------------------------------------------------------------------------------------------------------------------------------------------------------------------------------------------------------------------------------------------------------------------------------------------------------|
|                               | activity counteracts Rev/RRE<br>SFPQ and NONO/p54nrb assemble INS in gag and over-expression of PSF correlates with degradation of INS-containing RNA (Zolotukhin, 2003)                                                                                                                                                                                                                                              |
| SFRS1                         | Binds the RRE in a Rev-dependent fashion and overexpression can influence HIV RNA splicing and virus production (Jacquet et al., 2005; Powell et al., 1997; Ropers et al., 2004)<br>Interacts with HIV TAR RNA-Binding Protein (Chi et al., 2011)                                                                                                                                                                     |
| SFRS6                         | Identified in siRNA screen as playing a role in early events of HIV-1 infection (Konig et al., 2008)                                                                                                                                                                                                                                                                                                                  |
| SMC3                          | Identified as HIV-1 Tat interaction partner by an <i>in vitro</i> proteomics approach (Gautier et al., 2009)                                                                                                                                                                                                                                                                                                          |
| SNRNP200                      | Packaged into HIV-1 particles from human lymphoma T cells; function unknown (Santos 2012)                                                                                                                                                                                                                                                                                                                             |
| SNRNP70                       | Component of the U1 snRNP (Wu and Maniatis, 1993) that interacts with HIV-1 major splice donor (Ashe et al., 1997)                                                                                                                                                                                                                                                                                                    |
| SNRPA                         | Component of the U1 snRNP (Wu and Maniatis, 1993) that interacts with HIV-1 major splice donor (Ashe et al., 1997)<br>SNRPA specifically upregulated by HIV-1 Nef (Simmons et al., 2001)<br>Highly reduced in the nucleoli of HIV-1 Tat expressing Jurkat T-cells (Jarbouli et al., 2012)                                                                                                                             |
| SNRPD1                        | Interacts with HIV-1 Tar RNA-binding protein (Chi et al., 2011)<br>identified in siRNA screen of factors involved in HIV-1 replication (Genovesio et al., 2011)                                                                                                                                                                                                                                                       |
| SNRPD3                        | Interacts with HIV-1 TAR RNA-binding protein (Chi et al., 2011)<br>Interacts with HIV Tat (Fu et al., 2009; Pinney et al., 2009; Ptak et al., 2008)                                                                                                                                                                                                                                                                   |
| SPTAN1                        | Originally identified in siRNA screen for factors required for HIV-1 infection (Brass et al., 2008), however susceptibility of HIV-1 to knockdown is dependent on the envelope used for the assay with authentic HIV env conferring more susceptibility than VSV-G (Gallo and Hope, 2012)                                                                                                                             |
| SPTBN1                        | Originally identified in siRNA screen for factors required for HIV-1 infection (Brass et al., 2008); notably, susceptibility of HIV-1 to knockdown is dependent on the envelope used for the assay with authentic HIV env conferring more susceptibility than VSV-G (Gallo and Hope, 2012)<br>Associates with HIV-1 Gag protein and knockdown confers resistance to HIV-1 infection in macrophages (Dai et al., 2013) |
| SSB                           | Addition of purified <i>E. coli</i> SSB increased strand displacement synthesis of HIV-1 RT <i>in vitro</i> (Fuentes et al., 1996)                                                                                                                                                                                                                                                                                    |
| SSRP1                         | Identified as HIV-1 Tat interaction partner via <i>in vitro</i> proteomics study (Gautier et al., 2009)<br>Addition of purified <i>E. coli</i> SSB increased strand displacement synthesis of HIV-1 RT <i>in vitro</i> (Fuentes et al., 1996)                                                                                                                                                                         |
| STAU1                         | Influences HIV-1 Gag multimerization for virus particle assembly (Chatel-Chaix, 2007)<br>Present in the HIV genomic RNP (Chatel-Chaix, 2004; Milev, 2010)<br>Staufen interacts with HIV Gag via zinc fingers in NC (Chatel-Chaix, 2008)<br>Staufen is packaged into HIV virions (Mouland, 2000)                                                                                                                       |
| SUB1                          | Associated with LEDGF, postulated to be involved in retroviral integration site selection (Desfarges and Ciuffi, 2010)                                                                                                                                                                                                                                                                                                |
| SYNCRIP/HNRNPQ                | SYNCRIP (HNRNPQ) interacts directly with HIV-1 Rev and influences translation of Rev-dependent transcripts (Hadian et al., 2009; Vincendeau et al., 2013)<br>Interacts with HIV TAR RNA-Binding Protein (Chi et al., 2011)                                                                                                                                                                                            |
| TARDBP                        | A transcriptional repressor that binds to HIV proviral DNA at pyrimidine-rich elements in corresponding to TAR; represses HIV-1 transcription irrespective of the presence of Tat <i>in vitro</i> ; does not bind TAR RNA (Ou et al., 1995)                                                                                                                                                                           |
| THRAP3                        | Interacts with acylated HIV-1 integrase in a yeast-two hybrid screen and IP (Allouch and Cereseto, 2011)                                                                                                                                                                                                                                                                                                              |
| TOP1                          | Interacts with HIV-1 NC domain of Gag and augments reverse transcriptase activity (Takahashi et al., 1995)<br>May be packaged into HIV-1 particles, although conflicting evidence exists (Jardine et al., 1993; Priel et al., 1990)<br>Interacts with HIV TAR RNA-Binding Protein (Chi et al., 2011)                                                                                                                  |
| TOP2A                         | Evidence for HIV-1 integration at TOP2A locus in resting CD4+ T-cells; however integration did not appear to induce TOP2A expression (Han et al., 2004)<br>Interacts with HIV TAR RNA-Binding Protein (Chi et al., 2011)                                                                                                                                                                                              |
| TPM1                          | Downregulated in dorsal root ganglia of a neuropathic rat model treated with HIV-1 gp120 and the reverse transcriptase inhibitor ddC (Maratou et al., 2009)                                                                                                                                                                                                                                                           |
| TRA2B                         | Overexpression of TRA2B resulted in a decrease in all species of HIV-1 RNA and Gag production (Wong et al., 2013)                                                                                                                                                                                                                                                                                                     |
| TUBA1B, TUBA3E, TUBB, TUBB2C, | HIV-1 Rev causes depolymerization of microtubules <i>in vitro</i> and <i>Xenopus</i> egg extracts (Watts et al., 2000) and HIV-1 Tat binds tubulin and can result in cell apoptosis through a microtubule-                                                                                                                                                                                                            |

|                                                                                                                                                                                                                                                                                                                                                                                                                                                                                                                                                                                              |                                                                                                                                                                                                                                                                                                                                                                     |
|----------------------------------------------------------------------------------------------------------------------------------------------------------------------------------------------------------------------------------------------------------------------------------------------------------------------------------------------------------------------------------------------------------------------------------------------------------------------------------------------------------------------------------------------------------------------------------------------|---------------------------------------------------------------------------------------------------------------------------------------------------------------------------------------------------------------------------------------------------------------------------------------------------------------------------------------------------------------------|
| TUBB6                                                                                                                                                                                                                                                                                                                                                                                                                                                                                                                                                                                        | dependent mechanism (Chen et al., 2002)                                                                                                                                                                                                                                                                                                                             |
| TUBBP1                                                                                                                                                                                                                                                                                                                                                                                                                                                                                                                                                                                       | No identified role in retrovirus replication                                                                                                                                                                                                                                                                                                                        |
| UPF1                                                                                                                                                                                                                                                                                                                                                                                                                                                                                                                                                                                         | Component of HIV-1 RNP and positively regulates gag mRNA translation (Ajamian et al., 2008)                                                                                                                                                                                                                                                                         |
| XRCC5 (Ku80) and XRCC6                                                                                                                                                                                                                                                                                                                                                                                                                                                                                                                                                                       | Member of the Ku DNA damage response complex (Errami et al., 1996; Polo and Jackson, 2011) and shown to bind to the HIV-LTR and modulate transcription (Manic et al., 2013)<br>Tat expression increases nucleolar accumulation (Jarboui et al., 2012)<br>Ribozyme-mediated knockdown of XRCC5 inhibited HIV-1 transcription and integration (Waninger et al., 2004) |
| YBX1                                                                                                                                                                                                                                                                                                                                                                                                                                                                                                                                                                                         | Overexpression of YBX1 increases virus particle production of HIV-1 and an MLV-based vector by stabilizing viral genomic RNA (Li et al., 2012; Mu et al., 2013)<br>Involved in MMTV virus particle production (Bann et al., 2014)                                                                                                                                   |
| YY1                                                                                                                                                                                                                                                                                                                                                                                                                                                                                                                                                                                          | Decreases transcription from the HIV-1 LTR and production of virus particles through regulating chromatin modification (He and Margolis, 2002; Margolis et al., 1994)                                                                                                                                                                                               |
| <b>Proteins identified in this study with role in retroviral replication not known:</b><br>ACLY, ACTN1, AIMP2, CABP4, CIRBP, COL6A1, COL6A2, CPS1, DHX36, EIF2S3, EPRS, FARSA, FLNB, FUBP3, GTPBP1, H1F0, H1FX, H2AFX, H2AFZ, H2A-IX, H3F3C, H4-VII (HIST1H47), HDLBP, HIST1H1C, HIST2H2AA4, HIST2H2BE, HNRNPUL2, HNRPDL, HP1BP3, HSPA5, HSPB1, KHSRP, IGF2BP3, ILF2, LMNB2, LMO7, MYBBP1A, MYL4, MYL12B, NACA, NOLC1, NOP58, NUP210L, RARS, RPL10L, RPL11, RPL13, RPL14, RPL19, RPL36A, RPS3, RPS4X, RPSA, SARS2, SF3B1, SF3B3, SFRS13A, SLC25A3, SLC25A31, THOC4/ALYREF, URP, VIMURP, WDR3 |                                                                                                                                                                                                                                                                                                                                                                     |

#### References

Abbas, W., Dichamp, I., Herbein, G., 2012. The HIV-1 Nef protein interacts with two components of the 40S small ribosomal subunit, the RPS10 protein and the 18S rRNA. *Virology* 9, 103.

Ahn, J., Byeon, I.J., Dharmasena, S., Huber, K., Concel, J., Gronenborn, A.M., Sluis-Cremer, N., 2010. The RNA binding protein HuR does not interact directly with HIV-1 reverse transcriptase and does not affect reverse transcription in vitro. *Retrovirology* 7, 40.

Ajamian, L., Abrahamyan, L., Milev, M., Ivanov, P.V., Kulozik, A.E., Gehring, N.H., Mouland, A.J., 2008. Unexpected roles for UPF1 in HIV-1 RNA metabolism and translation. *Rna* 14, 914-927.

Allouch, A., Cereseto, A., 2011. Identification of cellular factors binding to acetylated HIV-1 integrase. *Amino Acids* 41, 1137-1145.

Alvarez, E., Castello, A., Menendez-Arias, L., Carrasco, L., 2006. HIV protease cleaves poly(A)-binding protein. *Biochem J* 396, 219-226.

Ashe, M.P., Pearson, L.H., Proudfoot, N.J., 1997. The HIV-1 5' LTR poly(A) site is inactivated by U1 snRNP interaction with the downstream major splice donor site. *Embo J* 16, 5752-5763.

Bacharach, E., Gonsky, J., Alin, K., Orlova, M., Goff, S.P., 2000. The carboxy-terminal fragment of nucleolin interacts with the nucleocapsid domain of retroviral gag proteins and inhibits virion assembly. *J Virol* 74, 11027-11039.

Bann, D.V., Beyer, A.R., Parent, L.J., 2014. A Murine Retrovirus Co-opts YB-1, a Translational Regulator and Stress Granule-Associated Protein, To Facilitate Virus Assembly. *J Virol* 88, 4434-4450.

Beyer, A.R., Bann, D.V., Rice, B., Pultz, I.S., Kane, M., Goff, S.P., Golovkina, T.V., Parent, L.J., 2013. Nucleolar trafficking of the mouse mammary tumor virus gag protein induced by interaction with ribosomal protein L9. *J Virol* 87, 1069-1082.

Black, A.C., Luo, J., Chun, S., Bakker, A., Fraser, J.K., Rosenblatt, J.D., 1996. Specific binding of polypyrimidine tract binding protein and hnRNP A1 to HIV-1 CRS elements. *Virus Genes* 12, 275-285.

Bolinger, C., Sharma, A., Singh, D., Yu, L., Boris-Lawrie, K., 2010. RNA helicase A modulates translation of HIV-1 and infectivity of progeny virions. *Nucleic Acids Res* 38, 1686-1696.

Boxus, M., Twizere, J.C., Legros, S., Dewulf, J.F., Kettmann, R., Willems, L., 2008. The HTLV-1 Tax interactome. *Retrovirology* 5, 76.

Brass, A.L., Dykxhoorn, D.M., Benita, Y., Yan, N., Engelman, A., Xavier, R.J., Lieberman, J., Elledge, S.J., 2008. Identification of host proteins required for HIV infection through a functional genomic screen. *Science* 319, 921-926.

Cachat, A., Chevalier, S.A., Alais, S., Ko, N.L., Ratner, L., Journo, C., Dutartre, H., Mahieux, R., 2013. Alpha interferon restricts human T-lymphotropic virus type 1 and 2 de novo infection through PKR activation. *J Virol* 87, 13386-13396.

Cen, S., Javanbakht, H., Kim, S., Shiba, K., Craven, R., Rein, A., Ewalt, K., Schimmel, P., Musier-Forsyth, K., Kleiman, L., 2002. Retrovirus-specific packaging of aminoacyl-tRNA synthetases with cognate primer tRNAs. *J Virol* 76, 13111-13115.

Chen, D., Wang, M., Zhou, S., Zhou, Q., 2002. HIV-1 Tat targets microtubules to induce apoptosis, a process promoted by the pro-apoptotic Bcl-2 relative Bim. *Embo J* 21, 6801-6810.

Chi, Y.H., Semmes, O.J., Jeang, K.T., 2011. A proteomic study of TAR-RNA binding protein (TRBP)-associated factors. *Cell Biosci* 1, 9.

Cooper, J., Liu, L., Woodruff, E.A., Taylor, H.E., Goodwin, J.S., D'Aquila, R.T., Spearman, P., Hildreth, J.E., Dong, X., 2011. Filamin A protein interacts with human immunodeficiency virus type 1 Gag protein and contributes to productive particle assembly. *J Biol Chem* 286, 28498-28510.

Dai, L., Lidie, K.B., Chen, Q., Adelsberger, J.W., Zheng, X., Huang, D., Yang, J., Lempicki, R.A., Rehman, T., Dewar, R.L., Wang, Y., Hornung, R.L., Canizales, K.A., Lockett, S.J., Lane, H.C., Imamichi, T., 2013. IL-27 inhibits HIV-1 infection in human macrophages by down-regulating host factor SPTBN1 during monocyte to macrophage differentiation. *J Exp Med* 210, 517-534.

Desfarges, S., Ciuffi, A., 2010. Retroviral integration site selection. *Viruses* 2, 111-130.

Doueiri, R., Anupam, R., Kvaratskhelia, M., Green, K.B., Lairmore, M.D., Green, P.L., 2012. Comparative host protein interactions with HTLV-1 p30 and HTLV-2 p28: insights into difference in pathobiology of human retroviruses. *Retrovirology* 9, 64.

Errami, A., Smider, V., Rathmell, W.K., He, D.M., Hendrickson, E.A., Zdzienicka, M.Z., Chu, G., 1996. Ku86 defines the genetic defect and restores X-ray resistance and V(D)J recombination to complementation group 5 hamster cell mutants. *Mol Cell Biol* 16, 1519-1526.

Fang, D., Haraguchi, Y., Jinno, A., Soda, Y., Shimizu, N., Hoshino, H., 1999. Heat shock cognate protein 70 is a cell fusion-enhancing factor but not an entry factor for human T-cell lymphotropic virus type I. *Biochem Biophys Res Commun* 261, 357-363.

Fu, W., Sanders-Bear, B.E., Katz, K.S., Maglott, D.R., Pruitt, K.D., Ptak, R.G., 2009. Human immunodeficiency virus type 1, human protein interaction database at NCBI. *Nucleic Acids Res* 37, D417-422.

Fuentes, G.M., Rodriguez-Rodriguez, L., Palaniappan, C., Fay, P.J., Bambara, R.A., 1996. Strand displacement synthesis of the long terminal repeats by HIV reverse transcriptase. *J Biol Chem* 271, 1966-1971.

Fujii, R., Okamoto, M., Aratani, S., Oishi, T., Ohshima, T., Taira, K., Baba, M., Fukamizu, A., Nakajima, T., 2001. A Role of RNA Helicase A in cis-Acting Transactivation Response Element-mediated Transcriptional Regulation of Human Immunodeficiency Virus Type 1. *J Biol Chem* 276, 5445-5451.

Gadad, S.S., Rajan, R.E., Senapati, P., Chatterjee, S., Shandilya, J., Dash, P.K., Ranga, U., Kundu, T.K., 2011a. HIV-1 infection induces acetylation of NPM1 that facilitates Tat localization and enhances viral transactivation. *J Mol Biol* 410, 997-1007.

Gadad, S.S., Senapati, P., Syed, S.H., Rajan, R.E., Shandilya, J., Swaminathan, V., Chatterjee, S., Colombo, E., Dimitrov, S., Pelicci, P.G., Ranga, U., Kundu, T.K., 2011b. The multifunctional protein nucleophosmin (NPM1) is a human linker histone H1 chaperone. *Biochemistry* 50, 2780-2789.

Gallo, D.E., Hope, T.J., 2012. Knockdown of MAP4 and DNAL1 produces a post-fusion and pre-nuclear translocation impairment in HIV-1 replication. *Virology* 422, 13-21.

Gaudin, R., de Alencar, B.C., Jouve, M., Berre, S., Le Boudier, E., Schindler, M., Varthaman, A., Gobert, F.X., Benaroch, P., 2012. Critical role for the kinesin KIF3A in the HIV life cycle in primary human macrophages. *J Cell Biol* 199, 467-479.

Gautier, V.W., Gu, L., O'Donoghue, N., Pennington, S., Sheehy, N., Hall, W.W., 2009. In vitro nuclear interactome of the HIV-1 Tat protein. *Retrovirology* 6, 47.

Genovesio, A., Kwon, Y.J., Windisch, M.P., Kim, N.Y., Choi, S.Y., Kim, H.C., Jung, S., Mammano, F., Perrin, V., Boese, A.S., Casartelli, N., Schwartz, O., Nehrbass, U., Emans, N., 2011. Automated genome-wide visual profiling of cellular proteins involved in HIV infection. *J Biomol Screen* 16, 945-958.

Giles, K.E., Beemon, K.L., 2005. Retroviral splicing suppressor sequesters a 3' splice site in a 50S aberrant splicing complex. *Mol Cell Biol* 25, 4397-4405.



Gordon-Alonso, M., Rocha-Perugini, V., Alvarez, S., Ursa, A., Izquierdo-Useros, N., Martinez-Picado, J., Munoz-Fernandez, M.A., Sanchez-Madrid, F., 2013. Actin-binding protein drebrin regulates HIV-1-triggered actin polymerization and viral infection. *J Biol Chem* 288, 28382-28397.

Green, L., Houck-Loomis, B., Yueh, A., Goff, S.P., 2012. Large ribosomal protein 4 increases efficiency of viral recoding sequences. *J Virol* 86, 8949-8958.

Hadian, K., Vincendeau, M., Mausbacher, N., Nagel, D., Hauck, S.M., Ueffing, M., Loyter, A., Werner, T., Wolff, H., Brack-Werner, R., 2009. Identification of a heterogeneous nuclear ribonucleoprotein-recognition region in the HIV Rev protein. *J Biol Chem* 284, 33384-33391.

Hallay, H., Locker, N., Ayadi, L., Ropers, D., Guittet, E., Branlant, C., 2006. Biochemical and NMR study on the competition between proteins SC35, SRp40, and heterogeneous nuclear ribonucleoprotein A1 at the HIV-1 Tat exon 2 splicing site. *J Biol Chem* 281, 37159-37174.

Han, Y., Lassen, K., Monie, D., Sedaghat, A.R., Shimoji, S., Liu, X., Pierson, T.C., Margolick, J.B., Siliciano, R.F., Siliciano, J.D., 2004. Resting CD4+ T cells from human immunodeficiency virus type 1 (HIV-1)-infected individuals carry integrated HIV-1 genomes within actively transcribed host genes. *J Virol* 78, 6122-6133.

Hartman, T.R., Qian, S., Bolinger, C., Fernandez, S., Schoenberg, D.R., Boris-Lawrie, K., 2006. RNA helicase A is necessary for translation of selected messenger RNAs. *Nat Struct Mol Biol* 13, 509-516.

Hays, T., D'Agati, V.D., Garellek, J.A., Warren, T., Trubin, M.E., Hyink, D.P., He, J.C., Klotman, P.E., 2012. Glomerular MYH9 expression is reduced by HIV-1. *Aids* 26, 797-803.

He, G., Margolis, D.M., 2002. Counterregulation of chromatin deacetylation and histone deacetylase occupancy at the integrated promoter of human immunodeficiency virus type 1 (HIV-1) by the HIV-1 repressor YY1 and HIV-1 activator Tat. *Mol Cell Biol* 22, 2965-2973.

Hong-Brown, L.Q., Brown, C.R., Lang, C.H., 2004. Indinavir impairs protein synthesis and phosphorylations of MAPKs in mouse C2C12 myocytes. *Am J Physiol Cell Physiol* 287, C1482-1492.

Hong-Brown, L.Q., Brown, C.R., Lang, C.H., 2005. HIV antiretroviral agents inhibit protein synthesis and decrease ribosomal protein S6 and 4EBP1 phosphorylation in C2C12 myocytes. *AIDS Res Hum Retroviruses* 21, 854-862.

Ishaq, M., Hu, J., Wu, X., Fu, Q., Yang, Y., Liu, Q., Guo, D., 2008. Knockdown of cellular RNA helicase DDX3 by short hairpin RNAs suppresses HIV-1 viral replication without inducing apoptosis. *Mol Biotechnol* 39, 231-238.

Jablonski, J.A., Caputi, M., 2009. Role of cellular RNA processing factors in human immunodeficiency virus type 1 mRNA metabolism, replication, and infectivity. *J Virol* 83, 981-992.

Jacquet, S., Decimo, D., Muriaux, D., Darlix, J.L., 2005. Dual effect of the SR proteins ASF/SF2, SC35 and 9G8 on HIV-1 RNA splicing and virion production. *Retrovirology* 2, 33.

Jarboui, M.A., Bidoia, C., Woods, E., Roe, B., Wynne, K., Elia, G., Hall, W.W., Gautier, V.W., 2012. Nucleolar protein trafficking in response to HIV-1 Tat: rewiring the nucleolus. *PLoS One* 7, e48702.

Jardine, D., Tachedjian, G., Locarnini, S., Birch, C., 1993. Cellular topoisomerase I activity associated with HIV-1. *AIDS Res Hum Retroviruses* 9, 1245-1250.

Javanbakht, H., Halwani, R., Cen, S., Saadatmand, J., Musier-Forsyth, K., Gottlinger, H., Kleiman, L., 2003. The interaction between HIV-1 Gag and human lysyl-tRNA synthetase during viral assembly. *J Biol Chem* 278, 27644-27651.

Jimenez-Baranda, S., Gomez-Mouton, C., Rojas, A., Martinez-Prats, L., Mira, E., Ana Lacalle, R., Valencia, A., Dimitrov, D.S., Viola, A., Delgado, R., Martinez, A.C., Manes, S., 2007. Filamin-A regulates actin-dependent clustering of HIV receptors. *Nat Cell Biol* 9, 838-846.

Joshi, P., Sloan, B., Torbett, B.E., Stoddart, C.A., 2013. Heat shock protein 90AB1 and hyperthermia rescue infectivity of HIV with defective cores. *Virology* 436, 162-172.

Joshi, P., Stoddart, C.A., 2011. Impaired infectivity of ritonavir-resistant HIV is rescued by heat shock protein 90AB1. *J Biol Chem* 286, 24581-24592.

Konig, R., Zhou, Y., Elleder, D., Diamond, T.L., Bonamy, G.M., Irelan, J.T., Chiang, C.Y., Tu, B.P., De Jesus, P.D., Lilley, C.E., Seidel, S., Opaluch, A.M., Caldwell, J.S., Weitzman, M.D., Kuhlen, K.L., Bandyopadhyay, S., Ideker, T., Orth, A.P., Miraglia, L.J., Bushman, F.D., Young, J.A., Chanda, S.K., 2008. Global analysis of host-pathogen interactions that regulate early-stage HIV-1 replication. *Cell* 135, 49-60.

Kress, E., Baydoun, H.H., Bex, F., Gazzolo, L., Duc Dodon, M., 2005. Critical role of hnRNP A1 in HTLV-1 replication in human transformed T lymphocytes. *Retrovirology* 2, 8.

Kula, A., Gharu, L., Marcello, A., 2013. HIV-1 pre-mRNA commitment to Rev mediated export through PSF and Matr3. *Virology* 435, 329-340.

Kula, A., Guerra, J., Knezevich, A., Kleva, D., Myers, M.P., Marcello, A., 2011. Characterization of the HIV-1 RNA associated proteome identifies Matr3 as a nuclear cofactor of Rev function. *Retrovirology* 8, 60.

Lai, M.C., Wang, S.W., Cheng, L., Tarn, W.Y., Tsai, S.J., Sun, H.S., 2013. Human DDX3 interacts with the HIV-1 Tat protein to facilitate viral mRNA translation. *PLoS One* 8, e68665.

Lee, H., Komano, J., Saitoh, Y., Yamaoka, S., Kozaki, T., Misawa, T., Takahama, M., Satoh, T., Takeuchi, O., Yamamoto, N., Matsuura, Y., Saitoh, T., Akira, S., 2013. Zinc-finger antiviral protein mediates retinoic acid inducible gene I-like receptor-independent antiviral response to murine leukemia virus. *Proc Natl Acad Sci U S A* 110, 12379-12384.

Lemay, J., Maidou-Peindara, P., Bader, T., Ennifar, E., Rain, J.C., Benarous, R., Liu, L.X., 2008. HuR interacts with human immunodeficiency virus type 1 reverse transcriptase, and modulates reverse transcription in infected cells. *Retrovirology* 5, 47.

Leung, J., Yueh, A., Appah, F.S., Jr., Yuan, B., de los Santos, K., Goff, S.P., 2006. Interaction of Moloney murine leukemia virus matrix protein with IQGAP. *Embo J* 25, 2155-2166.

Li, W., Wang, X., Gao, G., 2012. Expression of YB-1 enhances production of murine leukemia virus vectors by stabilizing genomic viral RNA. *Protein Cell* 3, 943-949.

Lorgeoux, R.P., Pan, Q., Le Duff, Y., Liang, C., 2013. DDX17 promotes the production of infectious HIV-1 particles through modulating viral RNA packaging and translation frameshift. *Virology* 443, 384-392.

Lund, N., Milev, M.P., Wong, R., Sanmuganatham, T., Woolaway, K., Chabot, B., Abou Elela, S., Mouland, A.J., Cochrane, A., 2012. Differential effects of hnRNP D/AUF1 isoforms on HIV-1 gene expression. *Nucleic Acids Res* 40, 3663-3675.

Mai, Y., Gao, G., 2010. Expression of IMP1 enhances production of murine leukemia virus vector by facilitating viral genomic RNA packaging. *PLoS One* 5, e15881.

Manic, G., Maurin-Marlin, A., Laurent, F., Vitale, I., Thierry, S., Delelis, O., Dessen, P., Vincendeau, M., Leib-Mosch, C., Hazan, U., Mouscadet, J.F., Bury-Mone, S., 2013. Impact of the Ku complex on HIV-1 expression and latency. *PLoS One* 8, e69691.

Maratou, K., Wallace, V.C., Hasnie, F.S., Okuse, K., Hosseini, R., Jina, N., Blackbeard, J., Pheby, T., Orengo, C., Dickenson, A.H., McMahon, S.B., Rice, A.S., 2009. Comparison of dorsal root ganglion gene expression in rat models of traumatic and HIV-associated neuropathic pain. *Eur J Pain* 13, 387-398.

Margolis, D.M., Somasundaran, M., Green, M.R., 1994. Human transcription factor YY1 represses human immunodeficiency virus type 1 transcription and virion production. *J Virol* 68, 905-910.

Massanella, M., Singhanian, A., Beliakova-Bethell, N., Pier, R., Lada, S.M., White, C.H., Perez-Santiago, J., Blanco, J., Richman, D.D., Little, S.J., Woelk, C.H., 2013. Differential gene expression in HIV-infected individuals following ART. *Antiviral Res* 100, 420-428.

Milev, M.P., Brown, C.M., Mouland, A.J., 2010. Live cell visualization of the interactions between HIV-1 Gag and the cellular RNA-binding protein Staufen1. *Retrovirology* 7, 41.

Micochova, P., Pelchen-Matthews, A., Marsh, M., 2013. Organization and regulation of intracellular plasma membrane-connected HIV-1 assembly compartments in macrophages. *BMC Biol* 11, 89.

Mu, X., Li, W., Wang, X., Gao, G., 2013. YB-1 stabilizes HIV-1 genomic RNA and enhances viral production. *Protein Cell* 4, 591-597.

Naji, S., Ambrus, G., Cimermancic, P., Reyes, J.R., Johnson, J.R., Filbrandt, R., Huber, M.D., Vesely, P., Krogan, N.J., Yates, J.R., 3rd, Saphire, A.C., Gerace, L., 2012. Host cell interactome of HIV-1 Rev includes RNA helicases involved in multiple facets of virus production. *Mol Cell Proteomics* 11, M111 015313.

Nguyen, D.G., Yin, H., Zhou, Y., Wolff, K.C., Kuhen, K.L., Caldwell, J.S., 2007. Identification of novel therapeutic targets for HIV infection through functional genomic cDNA screening. *Virology* 362, 16-25.

Nisole, S., Krust, B., Hovanessian, A.G., 2002. Anchorage of HIV on permissive cells leads to coaggregation of viral particles with surface nucleolin at membrane raft microdomains. *Exp Cell Res* 276, 155-173.

Olivares, E., Landry, D.M., Caceres, C.J., Pino, K., Rossi, F., Navarrete, C., Huidobro-Toro, J.P., Thompson, S.R.,

Lopez-Lastra, M., 2014. The 5' untranslated region of the human T-cell lymphotropic virus type 1 mRNA enables cap-independent translation initiation. *J Virol*.

Ou, S.H., Wu, F., Harrich, D., Garcia-Martinez, L.F., Gaynor, R.B., 1995. Cloning and characterization of a novel cellular protein, TDP-43, that binds to human immunodeficiency virus type 1 TAR DNA sequence motifs. *J Virol* 69, 3584-3596.

Pathak, S., De Souza, G.A., Salte, T., Wiker, H.G., Asjo, B., 2009. HIV induces both a down-regulation of IRAK-4 that impairs TLR signalling and an up-regulation of the antibiotic peptide dermcidin in monocytic cells. *Scand J Immunol* 70, 264-276.

Pinney, J.W., Dickerson, J.E., Fu, W., Sanders-Beer, B.E., Ptak, R.G., Robertson, D.L., 2009. HIV-host interactions: a map of viral perturbation of the host system. *Aids* 23, 549-554.

Polo, S.E., Jackson, S.P., 2011. Dynamics of DNA damage response proteins at DNA breaks: a focus on protein modifications. *Genes Dev* 25, 409-433.

Popken-Harris, P., Kirchhof, N., Harrison, B., Harris, L.F., 2006. Gene expression array analyses predict increased proto-oncogene expression in MMTV induced mammary tumors. *Virus Res* 119, 177-186.

Powell, D.M., Amaral, M.C., Wu, J.Y., Maniatis, T., Greene, W.C., 1997. HIV Rev-dependent binding of SF2/ASF to the Rev response element: possible role in Rev-mediated inhibition of HIV RNA splicing. *Proc Natl Acad Sci U S A* 94, 973-978.

Priel, E., Showalter, S.D., Roberts, M., Oroszlan, S., Segal, S., Aboud, M., Blair, D.G., 1990. Topoisomerase I activity associated with human immunodeficiency virus (HIV) particles and equine infectious anemia virus core. *Embo J* 9, 4167-4172.

Ptak, R.G., Fu, W., Sanders-Beer, B.E., Dickerson, J.E., Pinney, J.W., Robertson, D.L., Rozanov, M.N., Katz, K.S., Maglott, D.R., Pruitt, K.D., Dieffenbach, C.W., 2008. Cataloguing the HIV type 1 human protein interaction network. *AIDS Res Hum Retroviruses* 24, 1497-1502.

Rabson, A., Graves, B., 1997. Synthesis and Processing of Viral RNA, in: Coffin, J., Hughes, S., Varmus, H. (Eds.), *Retroviruses*. Cold Spring Harbor Laboratory Press, Cold Spring Harbor, NY, pp. 205-261.

Rivas-Aravena, A., Ramdohr, P., Vallejos, M., Valiente-Echeverria, F., Dormoy-Raclet, V., Rodriguez, F., Pino, K., Holzmann, C., Huidobro-Toro, J.P., Gallouzi, I.E., Lopez-Lastra, M., 2009. The Elav-like protein HuR exerts translational control of viral internal ribosome entry sites. *Virology* 392, 178-185.

Ropers, D., Ayadi, L., Gattoni, R., Jacquenet, S., Damier, L., Branlant, C., Stevenin, J., 2004. Differential effects of the SR proteins 9G8, SC35, ASF/SF2, and SRp40 on the utilization of the A1 to A5 splicing sites of HIV-1 RNA. *J Biol Chem* 279, 29963-29973.

Roy, B.B., Hu, J., Guo, X., Russell, R.S., Guo, F., Kleiman, L., Liang, C., 2006. Association of RNA helicase a with human immunodeficiency virus type 1 particles. *J Biol Chem* 281, 12625-12635.

Saadatmand, J., Guo, F., Cen, S., Niu, M., Kleiman, L., 2008. Interactions of reverse transcriptase sequences in Pol with Gag and LysRS in the HIV-1 tRNA<sup>Lys3</sup> packaging/annealing complex. *Virology* 380, 109-117.

Sadler, A.J., Latchoumanin, O., Hawkes, D., Mak, J., Williams, B.R., 2009. An antiviral response directed by PKR phosphorylation of the RNA helicase A. *PLoS Pathog* 5, e1000311.

Sagara, Y., Ishida, C., Inoue, Y., Shiraki, H., Maeda, Y., 1998. 71-kilodalton heat shock cognate protein acts as a cellular receptor for syncytium formation induced by human T-cell lymphotropic virus type 1. *J Virol* 72, 535-541.

Schweitzer, C.J., Matthews, J.M., Madson, C.J., Donnellan, M.R., Cerny, R.L., Belshan, M., 2012. Knockdown of the cellular protein LRPPRC attenuates HIV-1 infection. *PLoS One* 7, e40537.

Simmons, A., Aluvihare, V., McMichael, A., 2001. Nef triggers a transcriptional program in T cells imitating single-signal T cell activation and inducing HIV virulence mediators. *Immunity* 14, 763-777.

Soto-Rifo, R., Rubilar, P.S., Limousin, T., de Breyne, S., Decimo, D., Ohlmann, T., 2012. DEAD-box protein DDX3 associates with eIF4F to promote translation of selected mRNAs. *Embo J* 31, 3745-3756.

Stake, M.S., Bann, D.V., Kaddis, R.J., Parent, L.J., 2013. Nuclear trafficking of retroviral RNAs and Gag proteins during late steps of replication. *Viruses* 5, 2767-2795.

Takahashi, H., Matsuda, M., Kojima, A., Sata, T., Andoh, T., Kurata, T., Nagashima, K., Hall, W.W., 1995. Human immunodeficiency virus type 1 reverse transcriptase: enhancement of activity by interaction with cellular topoisomerase I. *Proc Natl Acad Sci U S A* 92, 5694-5698.

Tang, H., Wong-Staal, F., 2000. Specific interaction between RNA helicase A and Tap, two cellular proteins that bind to the constitutive transport element of type D retrovirus. *J Biol Chem* 275, 32694-32700.

Tarantul, V.Z., Nikolaev, A.I., Martynenko, A., Hannig, H., Hunsmann, G., Bodemer, W., 2000. Differential gene expression in B-cell non-Hodgkin's lymphoma of SIV-infected monkey. *AIDS Res Hum Retroviruses* 16, 173-179.

Ueno, T., Tokunaga, K., Sawa, H., Maeda, M., Chiba, J., Kojima, A., Hasegawa, H., Shoya, Y., Sata, T., Kurata, T., Takahashi, H., 2004. Nucleolin and the packaging signal, psi, promote the budding of human immunodeficiency virus type-1 (HIV-1). *Microbiol Immunol* 48, 111-118.

Urcuqui-Inchima, S., Castano, M.E., Hernandez-Verdun, D., St-Laurent, G., 3rd, Kumar, A., 2006. Nuclear Factor 90, a cellular dsRNA binding protein inhibits the HIV Rev-export function. *Retrovirology* 3, 83.

Valente, S.T., Goff, S.P., 2006. Inhibition of HIV-1 gene expression by a fragment of hnRNP U. *Mol Cell* 23, 597-605.

Valiente-Echeverria, F., Vallejos, M., Monette, A., Pino, K., Letelier, A., Huidobro-Toro, J.P., Mouland, A.J., Lopez-Lastra, M., 2013. A cis-acting element present within the Gag open reading frame negatively impacts on the activity of the HIV-1 IRES. *PLoS One* 8, e56962.

Vincendeau, M., Nagel, D., Brenke, J.K., Brack-Werner, R., Hadian, K., 2013. Heterogenous nuclear ribonucleoprotein Q increases protein expression from HIV-1 Rev-dependent transcripts. *Virol J* 10, 151.

Waninger, S., Kuhen, K., Hu, X., Chatterton, J.E., Wong-Staal, F., Tang, H., 2004. Identification of cellular cofactors for human immunodeficiency virus replication via a ribozyme-based genomics approach. *J Virol* 78, 12829-12837.

Watts, N.R., Sackett, D.L., Ward, R.D., Miller, M.W., Wingfield, P.T., Stahl, S.S., Steven, A.C., 2000. HIV-1 rev depolymerizes microtubules to form stable bilayered rings. *J Cell Biol* 150, 349-360.

Wen, X., Ding, L., Wang, J.J., Qi, M., Hammonds, J., Chu, H., Chen, X., Hunter, E., Spearman, P., 2014. ROCK1 and LIM Kinase Modulate Retrovirus Particle Release and Cell-Cell Transmission Events. *J Virol*.

Westberg, C., Yang, J.P., Tang, H., Reddy, T.R., Wong-Staal, F., 2000. A novel shuttle protein binds to RNA helicase A and activates the retroviral constitutive transport element. *J Biol Chem* 275, 21396-21401.



Wong, R.W., Balachandran, A., Ostrowski, M.A., Cochrane, A., 2013. Digoxin suppresses HIV-1 replication by altering viral RNA processing. *PLoS Pathog* 9, e1003241.

Wu, J.Y., Maniatis, T., 1993. Specific interactions between proteins implicated in splice site selection and regulated alternative splicing. *Cell* 75, 1061-1070.

Yamazaki, H., Nakata, T., Okada, Y., Hirokawa, N., 1995. KIF3A/B: a heterodimeric kinesin superfamily protein that works as a microtubule plus end-directed motor for membrane organelle transport. *J Cell Biol* 130, 1387-1399.

Yang, J.P., Tang, H., Reddy, T.R., Wong-Staal, F., 2001. Mapping the functional domains of HAP95, a protein that binds RNA helicase A and activates the constitutive transport element of type D retroviruses. *J Biol Chem* 276, 30694-30700.

Yasuda-Inoue, M., Kuroki, M., Ariumi, Y., 2013a. DDX3 RNA helicase is required for HIV-1 Tat function. *Biochem Biophys Res Commun* 441, 607-611.

Yasuda-Inoue, M., Kuroki, M., Ariumi, Y., 2013b. Distinct DDX DEAD-box RNA helicases cooperate to modulate the HIV-1 Rev function. *Biochem Biophys Res Commun* 434, 803-808.

Yavlovich, A., Viard, M., Zhou, M., Veenstra, T.D., Wang, J.M., Gong, W., Heldman, E., Blumenthal, R., Raviv, Y., 2012. Ectopic ATP synthase facilitates transfer of HIV-1 from antigen-presenting cells to CD4(+) target cells. *Blood* 120, 1246-1253.

Ye, P., Liu, S., Zhu, Y., Chen, G., Gao, G., 2010. DEXH-Box protein DHX30 is required for optimal function of the zinc-finger antiviral protein. *Protein Cell* 1, 956-964.

Yedavalli, V.S., Jeang, K.T., 2011. MatrIn 3 is a co-factor for HIV-1 Rev in regulating post-transcriptional viral gene expression. *Retrovirology* 8, 61.

Zhou, H., Jarujaron, S., Gurley, E.C., Chen, L., Ding, H., Studer, E., Pandak, W.M., Jr., Hu, W., Zou, T., Wang, J.Y., Hylemon, P.B., 2007. HIV protease inhibitors increase TNF-alpha and IL-6 expression in macrophages: involvement of the RNA-binding protein HuR. *Atherosclerosis* 195, e134-143.

Zhou, X., Luo, J., Mills, L., Wu, S., Pan, T., Geng, G., Zhang, J., Luo, H., Liu, C., Zhang, H., 2013. DDX5 facilitates HIV-1 replication as a cellular co-factor of Rev. *PLoS One* 8, e65040.

Zhou, Y., Ma, J., Bushan Roy, B., Wu, J.Y., Pan, Q., Rong, L., Liang, C., 2008a. The packaging of human immunodeficiency virus type 1 RNA is restricted by overexpression of an RNA helicase DHX30. *Virology* 372, 97-106.

Zhou, Y., Rong, L., Lu, J., Pan, Q., Liang, C., 2008b. Insulin-like growth factor II mRNA binding protein 1 associates with Gag protein of human immunodeficiency virus type 1, and its overexpression affects virus assembly. *J Virol* 82, 5683-5692.

Zhou, Y., Rong, L., Zhang, J., Aloysius, C., Pan, Q., Liang, C., 2009. Insulin-like growth factor II mRNA binding protein 1 modulates Rev-dependent human immunodeficiency virus type 1 RNA expression. *Virology* 393, 210-220.

Zolotukhin, A.S., Michalowski, D., Bear, J., Smulevitch, S.V., Traish, A.M., Peng, R., Patton, J., Shatsky, I.N., Felber, B.K., 2003. PSF acts through the human immunodeficiency virus type 1 mRNA instability elements to regulate virus expression. *Mol Cell Biol* 23, 6618-6630.
